# Supplementary material for: Paeoniflorin elevates the expression of SOCS3 in macrophages to prevent MIA-induced osteoarthritis in mice
Source: Research Square preprint supplement (doi:10.21203/rs.3.rs-7350648/v1), 2025-10-09
Supplement: Supplementary file 1 [file 475ccd11d991ae729d2c88eb.pdf]

# **Paeoniflorin elevates the expression of SOCS3 in macrophages to prevent MIA-induced osteoarthritis in mice**

Changlin Sun<sup>1\*</sup>, Xiuting Qi<sup>1\*</sup>, Xinmiao Qin<sup>1\*</sup>, Wen Fan<sup>1\*</sup>, Zijiao Tao<sup>2</sup>, Liang Hu<sup>1</sup>, Lai Jin<sup>1</sup>,

Chengyong Gu<sup>3✉</sup>, Wentao Liu<sup>1✉</sup>, Li Zhang<sup>4✉</sup>

<sup>1</sup> Department of Pharmacology, School of Basic Medical Sciences, Nanjing Medical University, Nanjing 211166, China

<sup>2</sup> International Healthcare Center, Sir Run Run Hospital, Nanjing Medical University, China

<sup>3</sup> Department of Anesthesiology, the Affiliated Suzhou Hospital of Nanjing Medical University, Suzhou Municipal Hospital, Gusu School, Nanjing Medical University, Suzhou, China.

<sup>4</sup> Department of Anesthesiology, Children's Hospital of Nanjing Medical University, Nanjing 210029, Jiangsu Province, China

✉ **Address correspondence to:**

Li zhang, Department of Anesthesiology, Children's Hospital of Nanjing Medical University, Nanjing 210029, Jiangsu Province, China, e-mail: drzhangli@njmu.edu.cn

Chengyong Gu, PhD, Department of Anesthesiology, the Affiliated Suzhou Hospital of Nanjing Medical University, Suzhou Municipal Hospital, Gusu School, Nanjing Medical University, Suzhou, China, e-mail: [gcygcy1979@163.com](mailto:gcygcy1979@163.com)

Wentao Liu, PhD, Department of Pharmacology, School of Basic Medical Sciences, Nanjing Medical University, Nanjing 211166, China, Tel: +86 02586869407, e-mail: [painresearch@njmu.edu.cn](mailto:painresearch@njmu.edu.cn)

Figure1.B

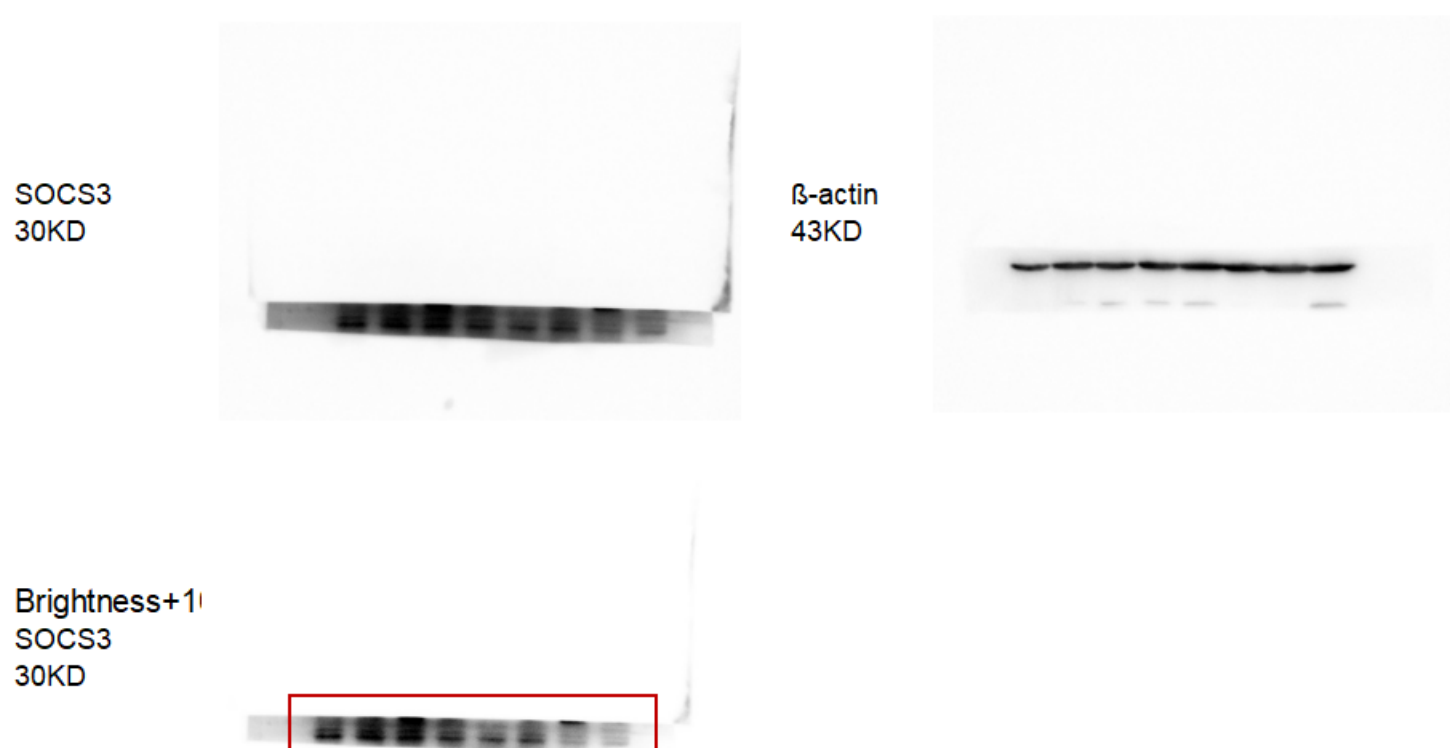

Figure1.C

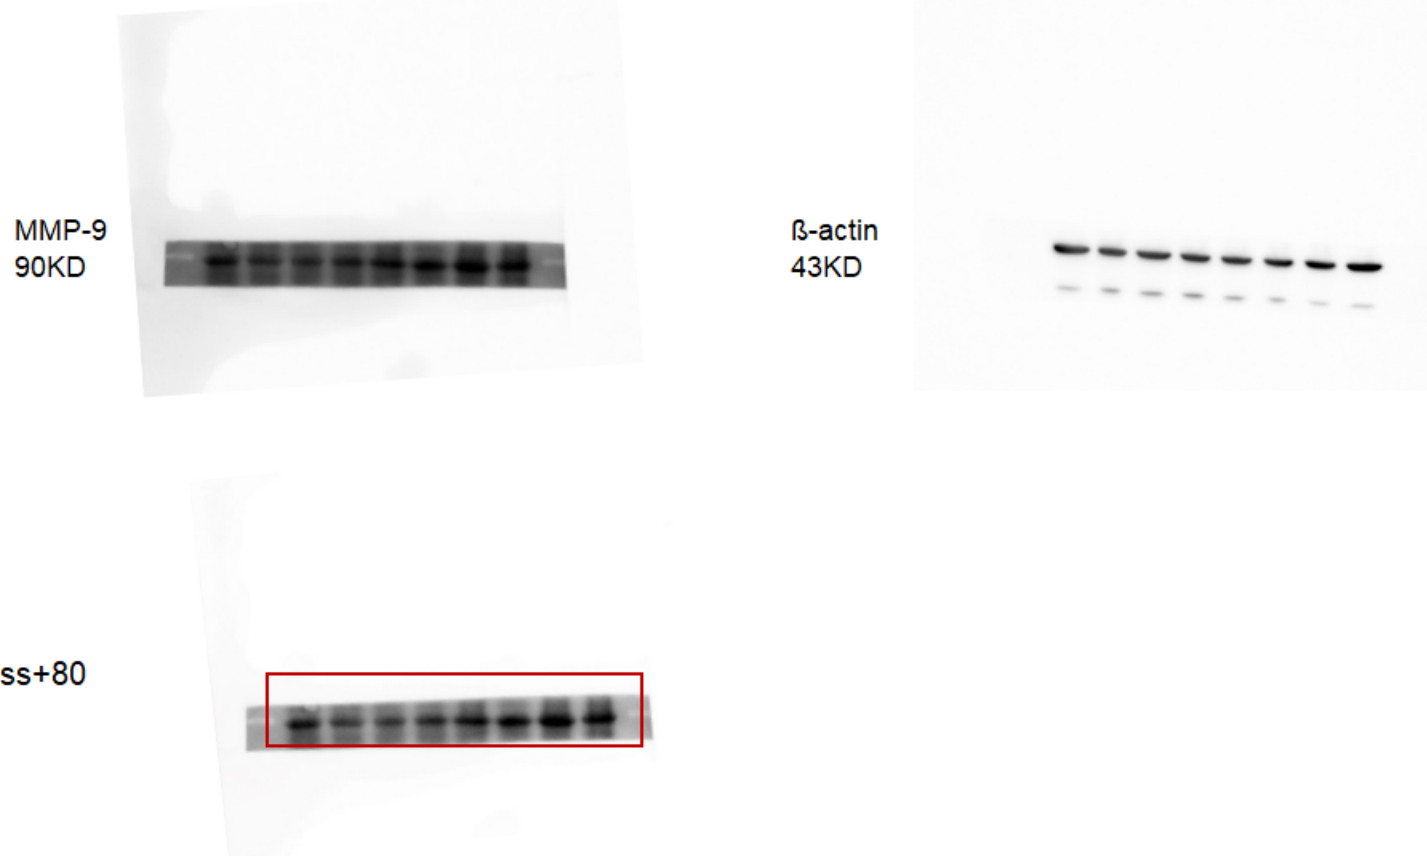

Figure1.D

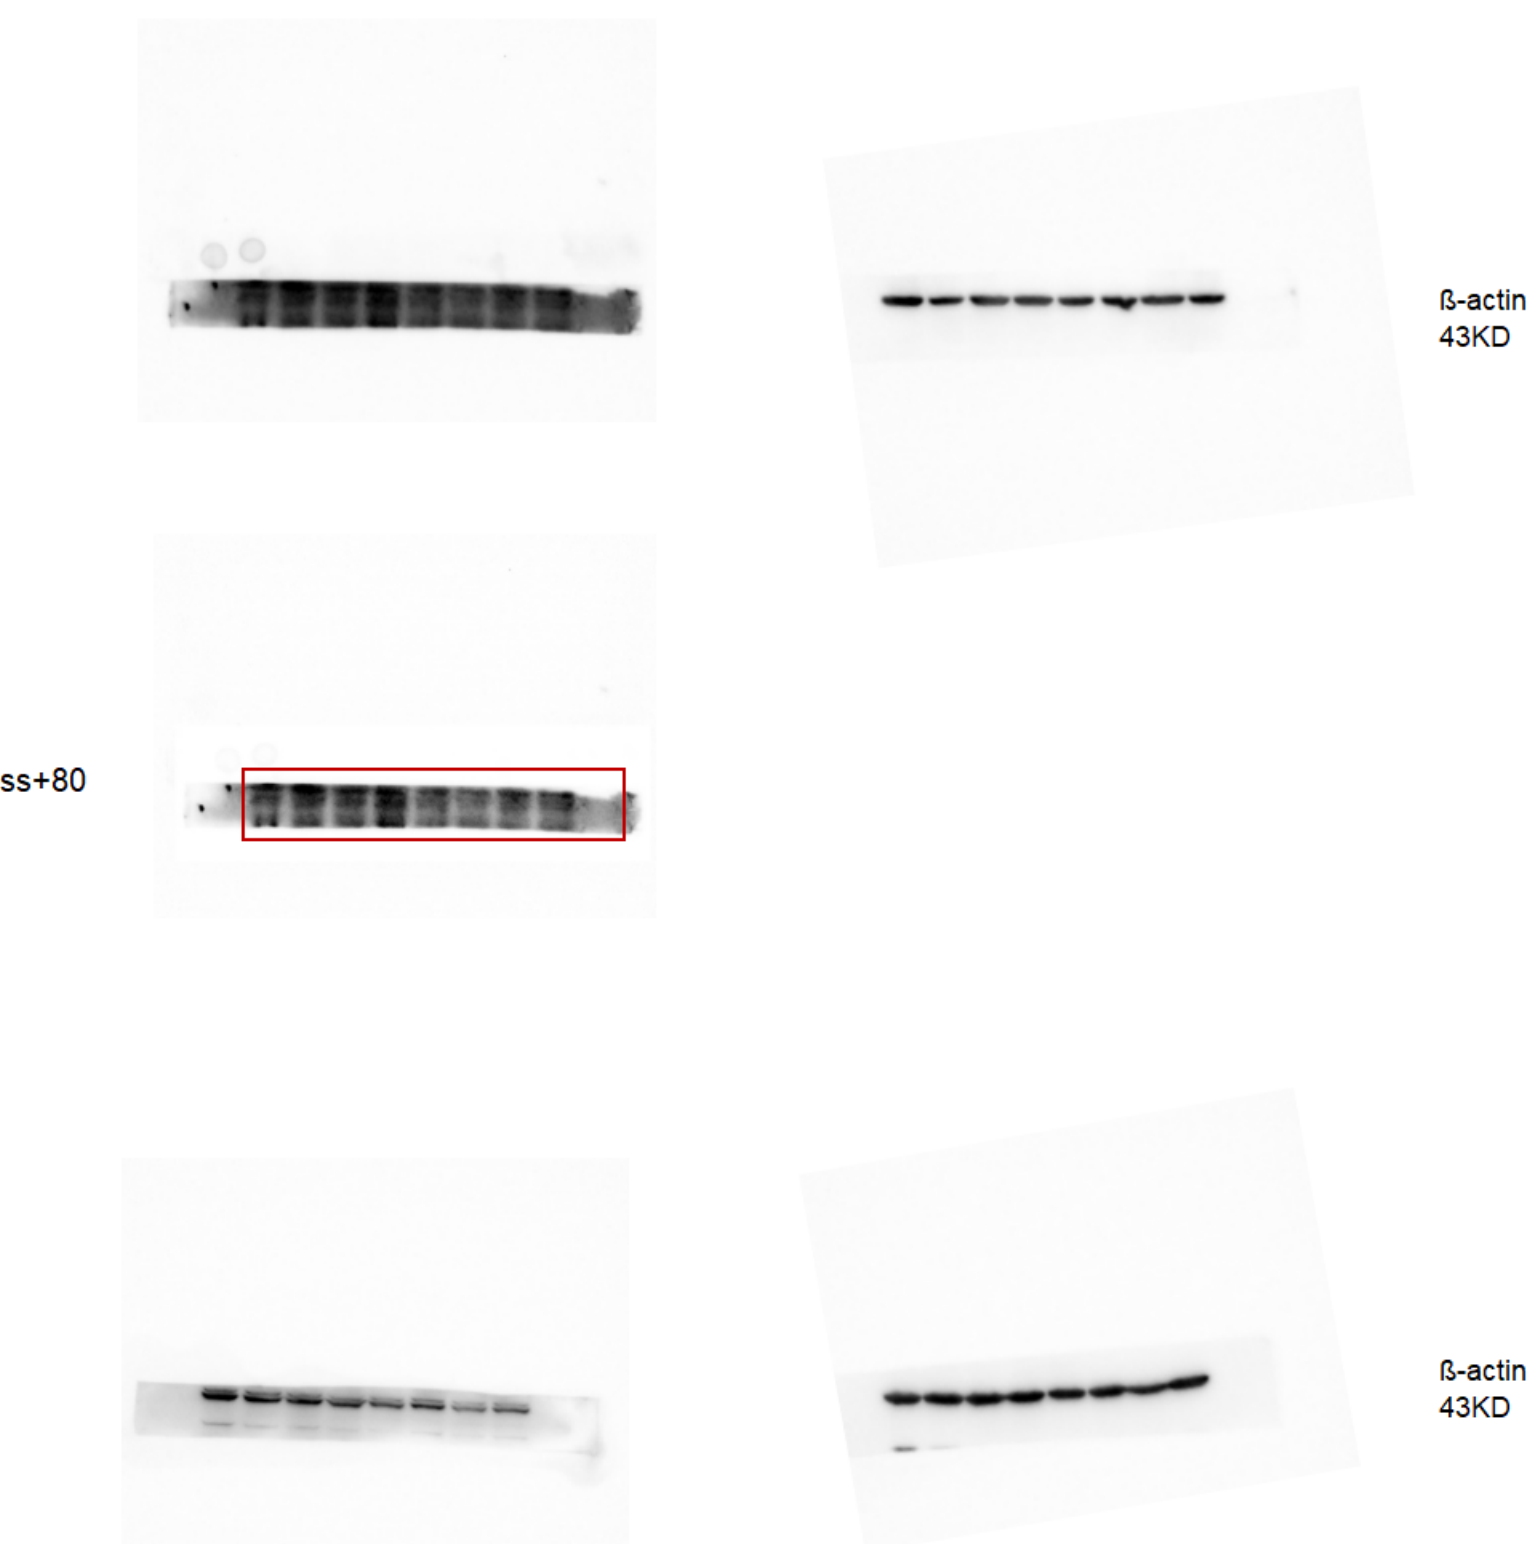

Figure1.G

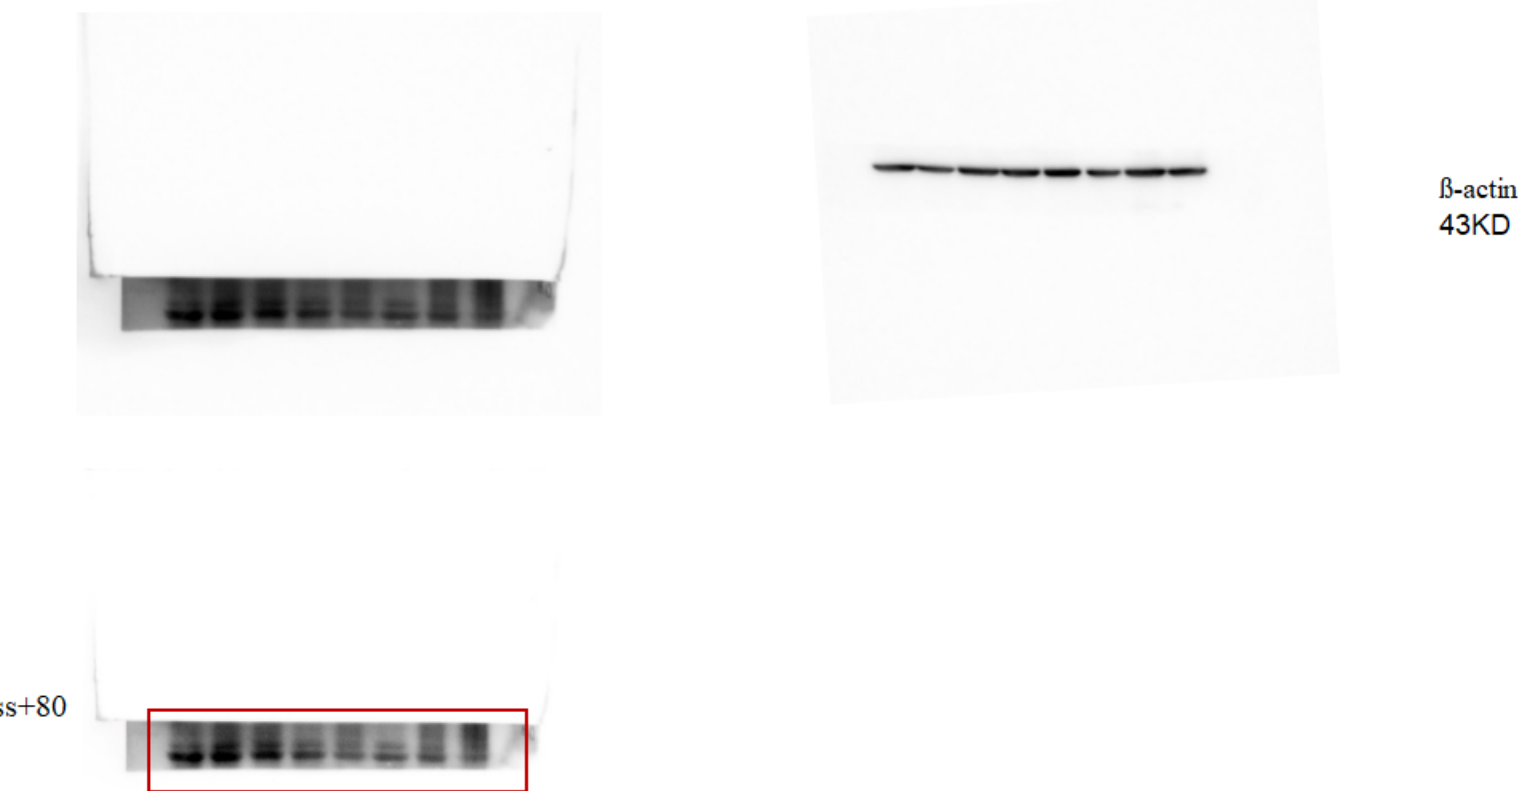

Figure1.H

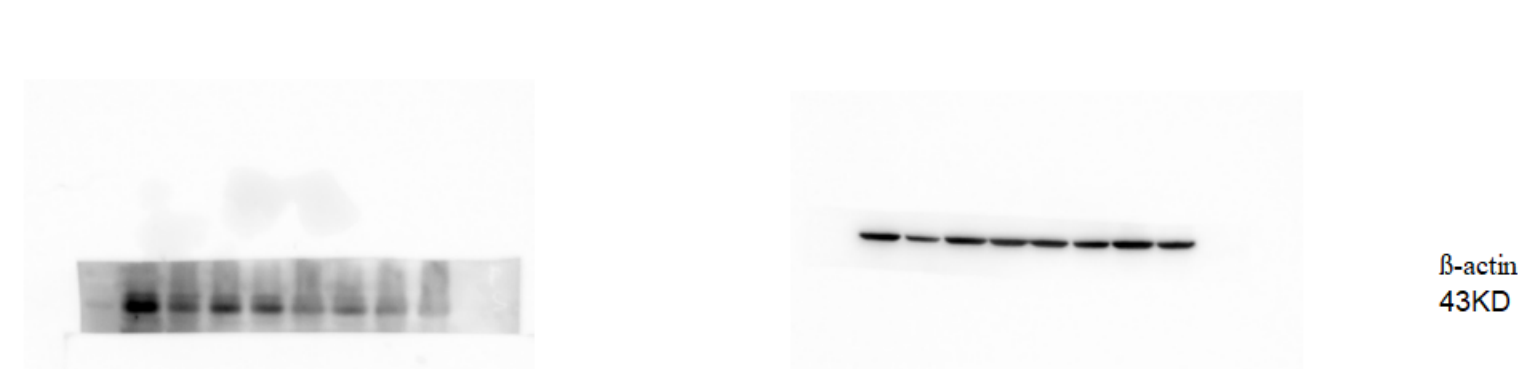

Figure3.A

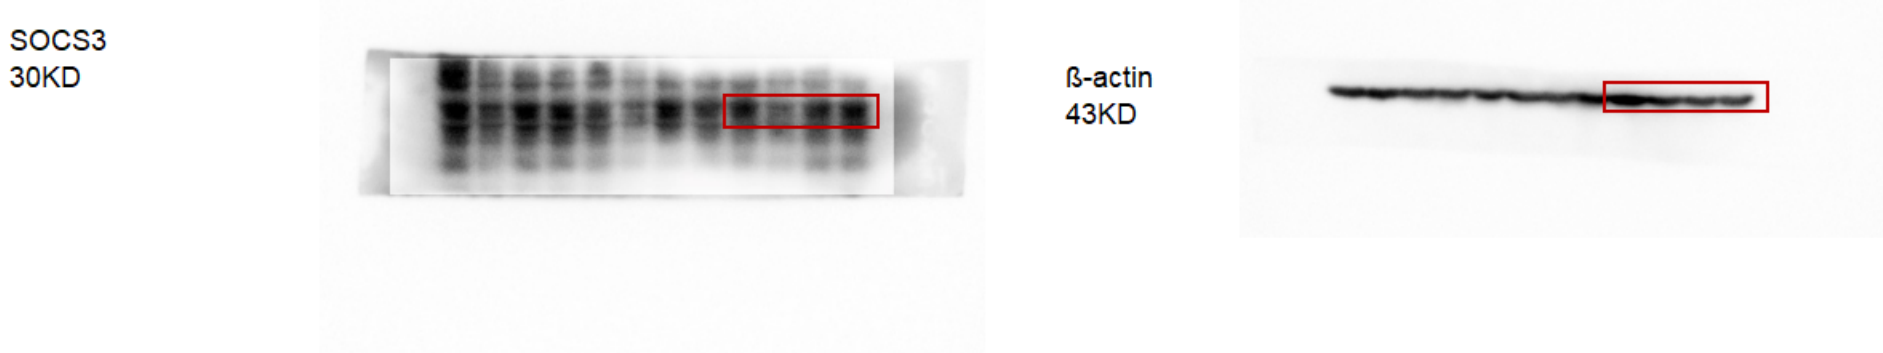

Figure3.B

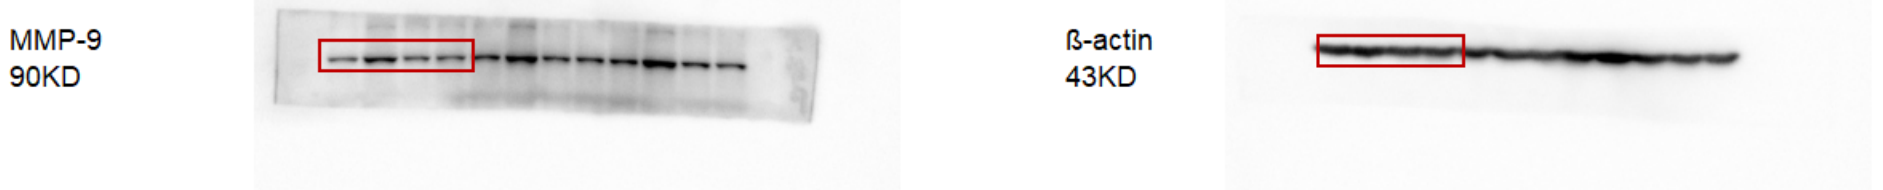

Figure3.C

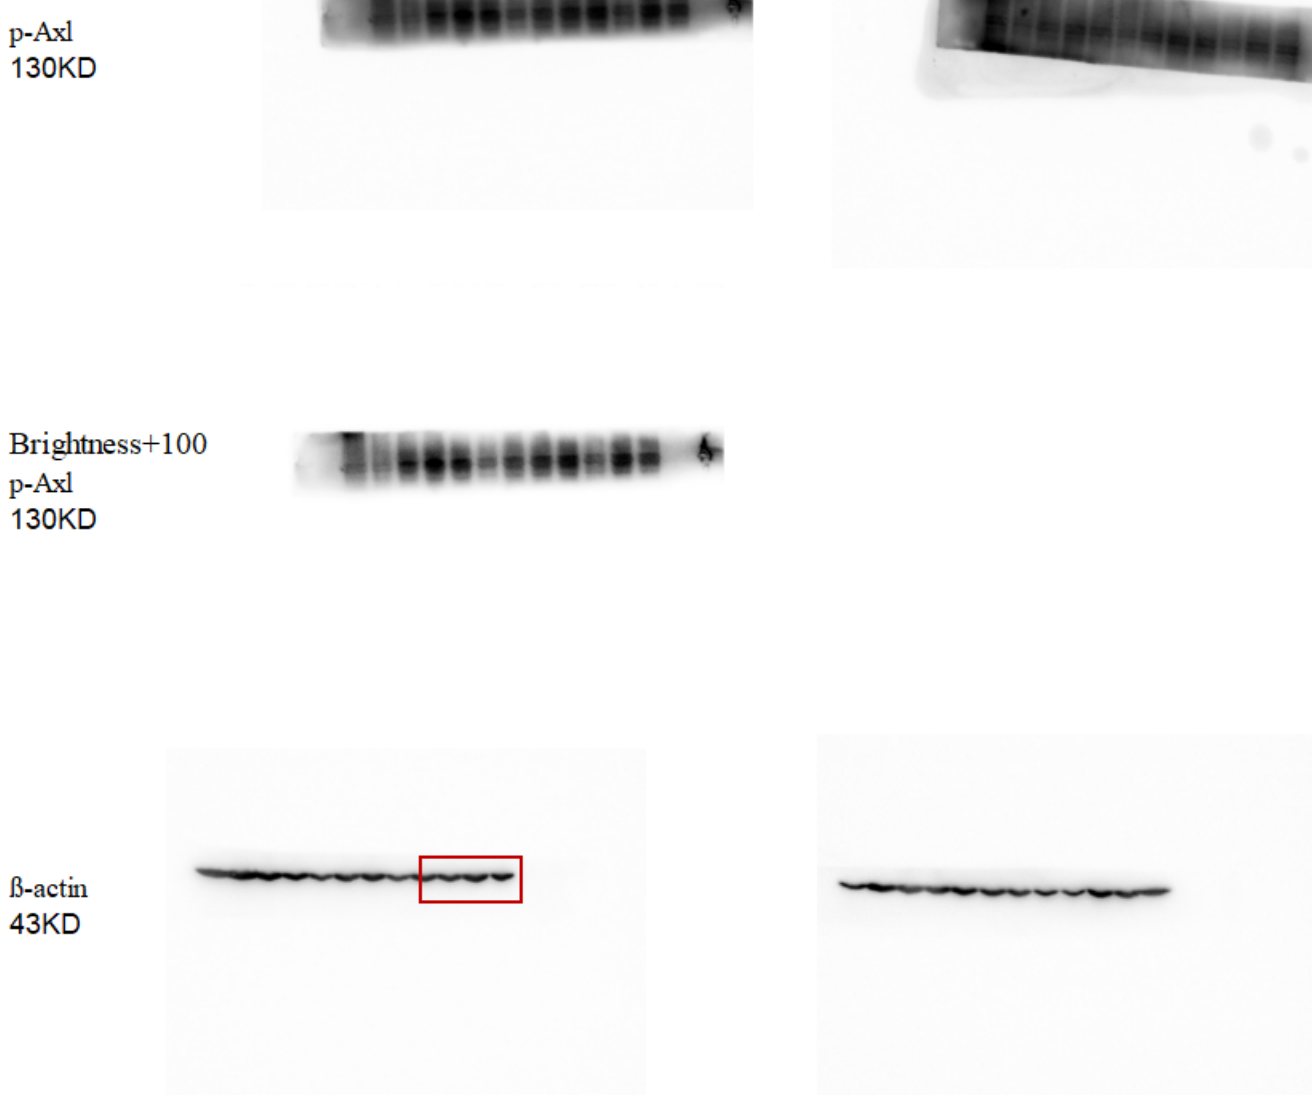

Figure3.D

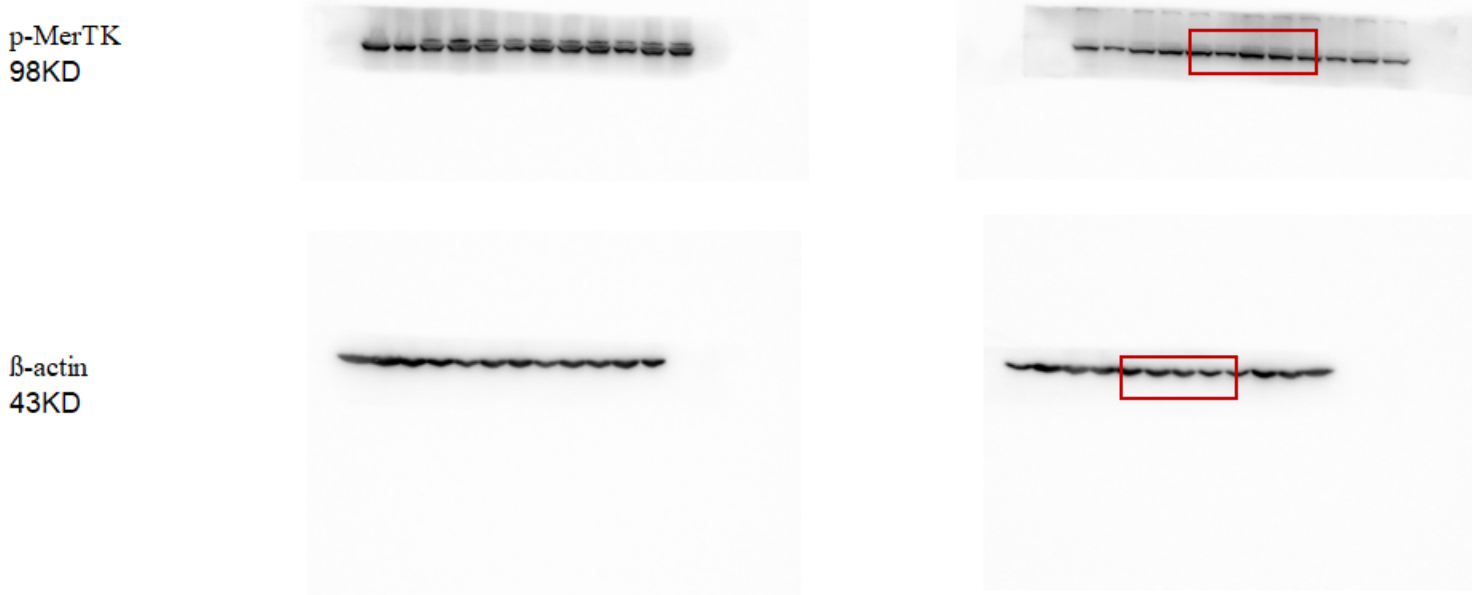

Figure3.E

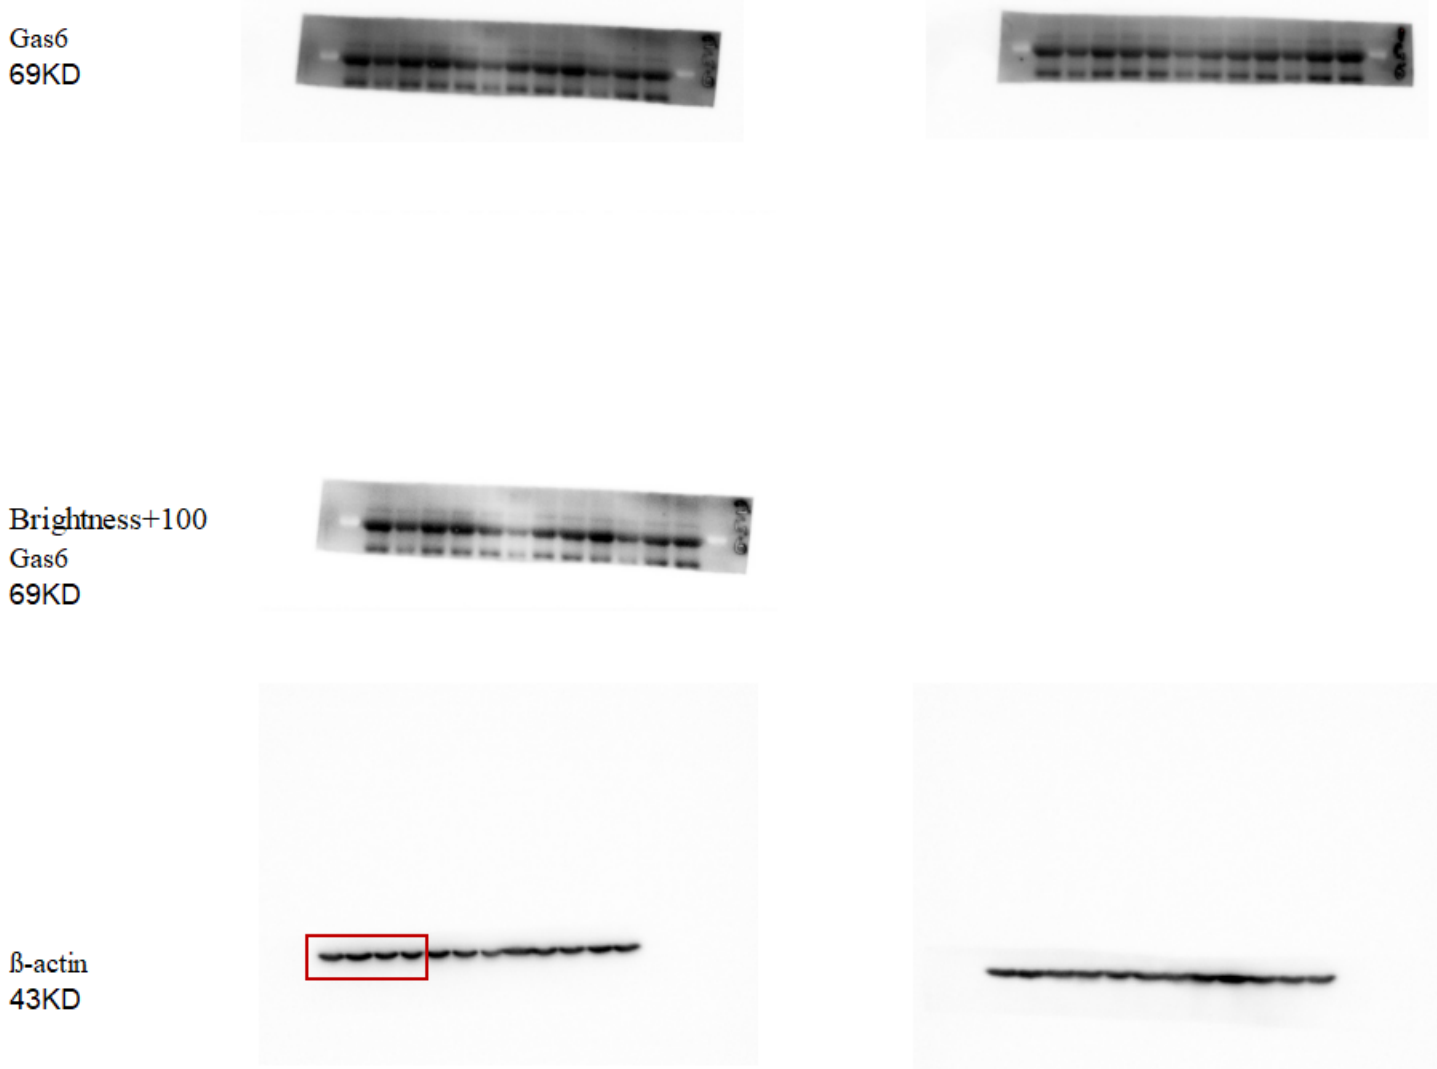

Figure3.F

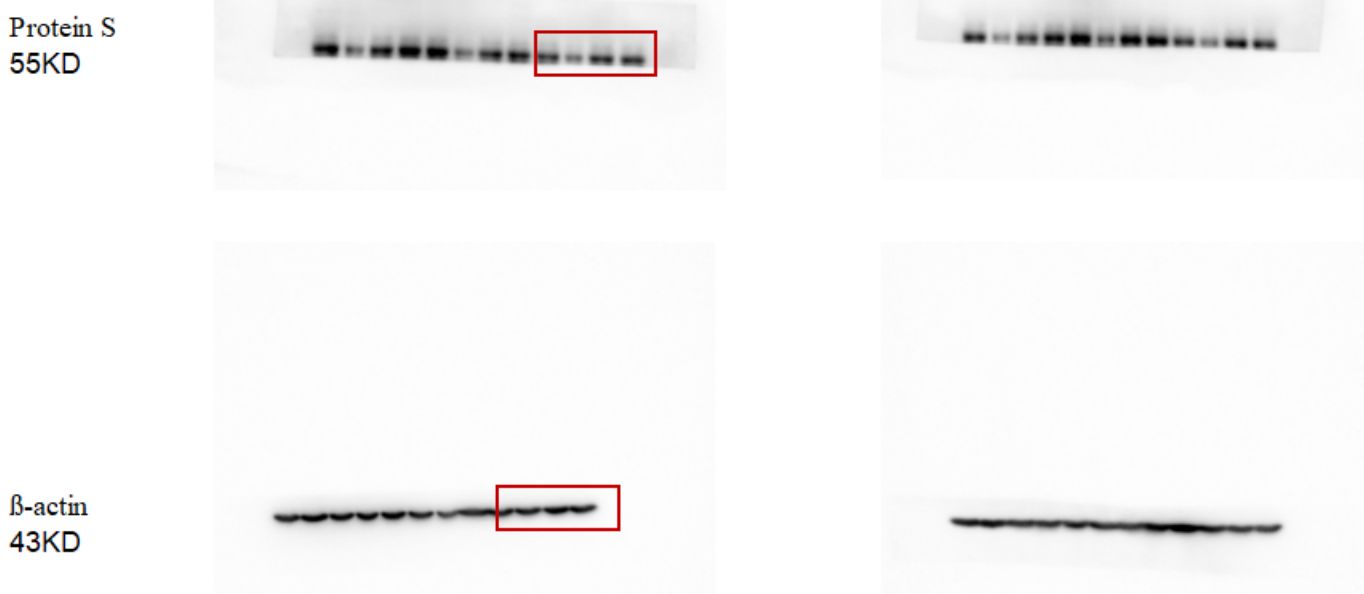

Figure4.A

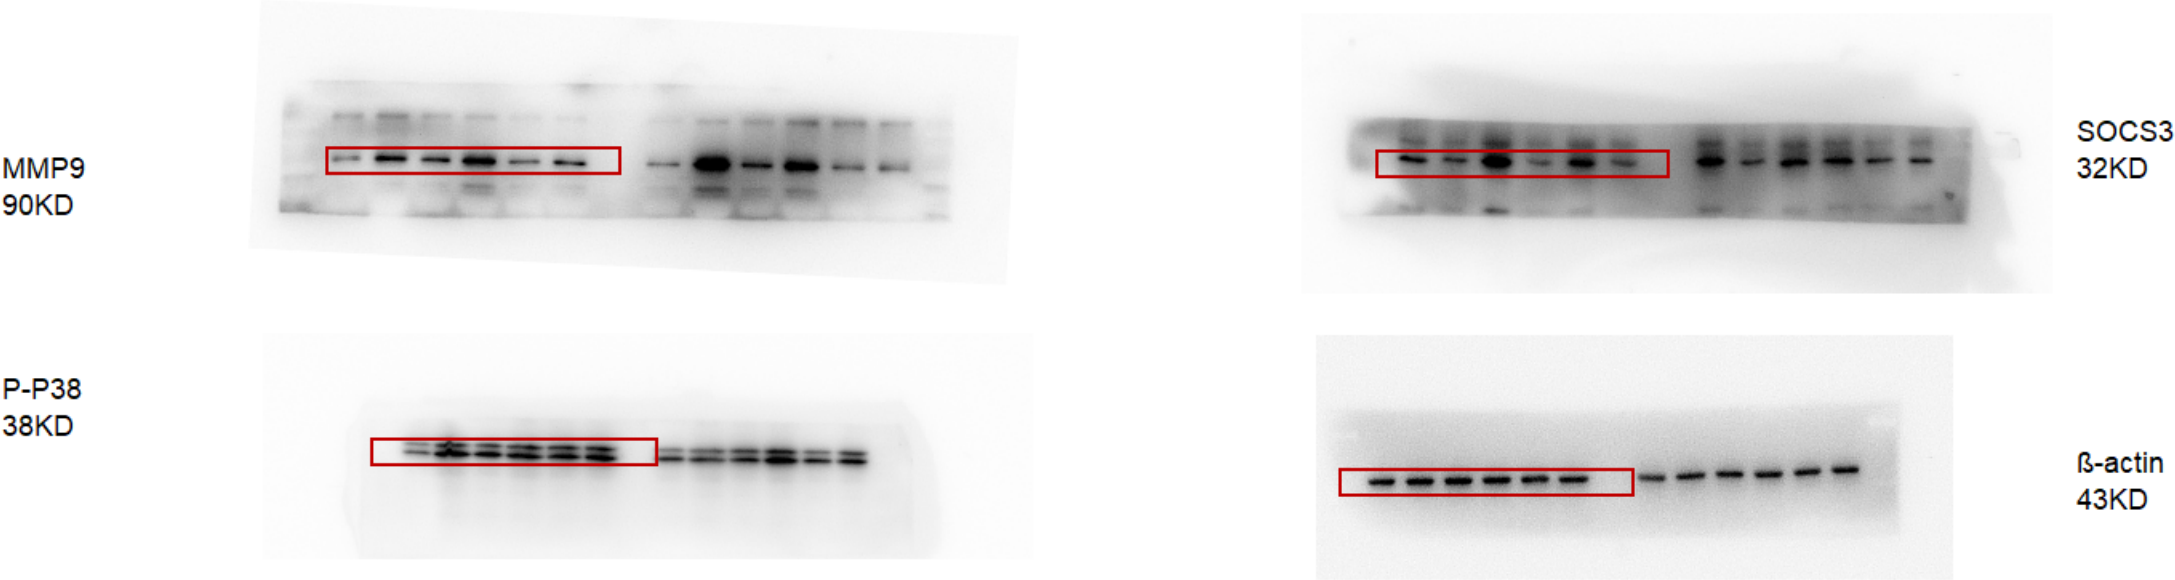

Figure4.F

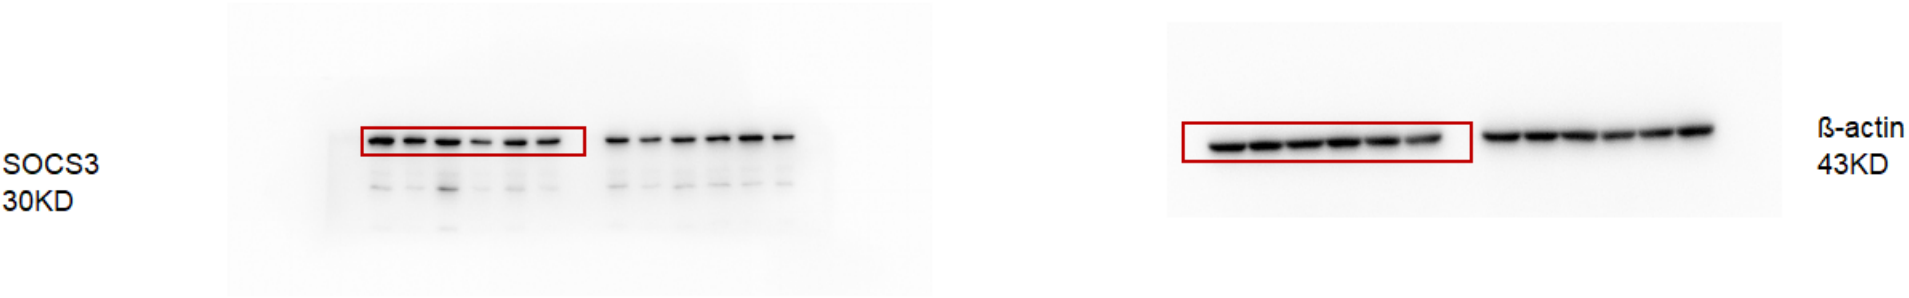

Figure4.G

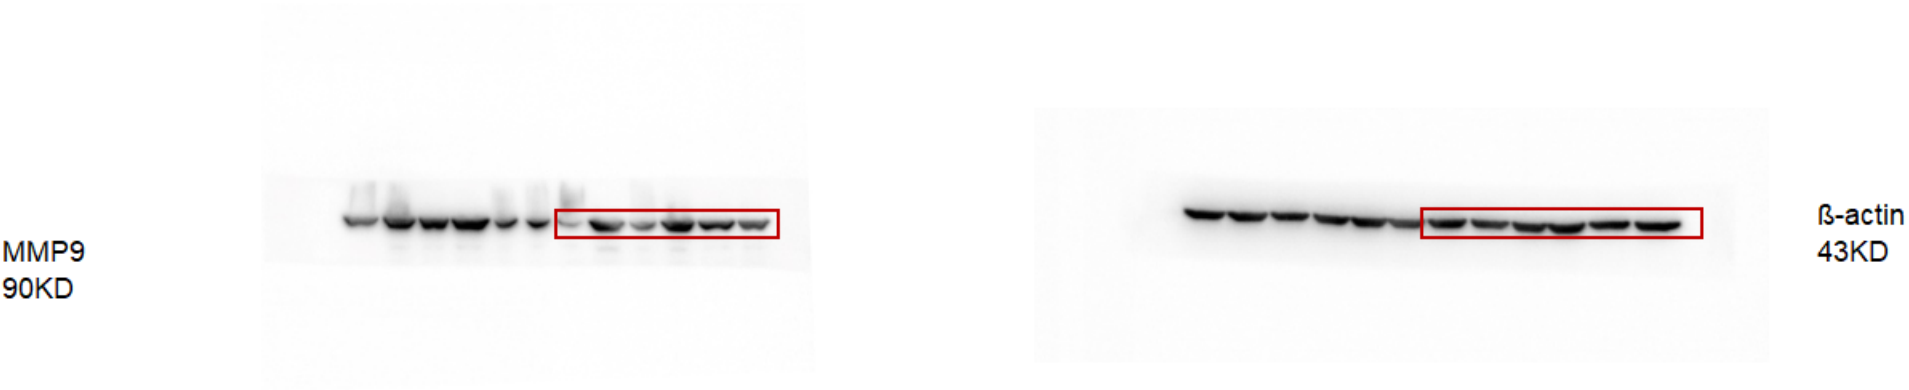

Figure4.H

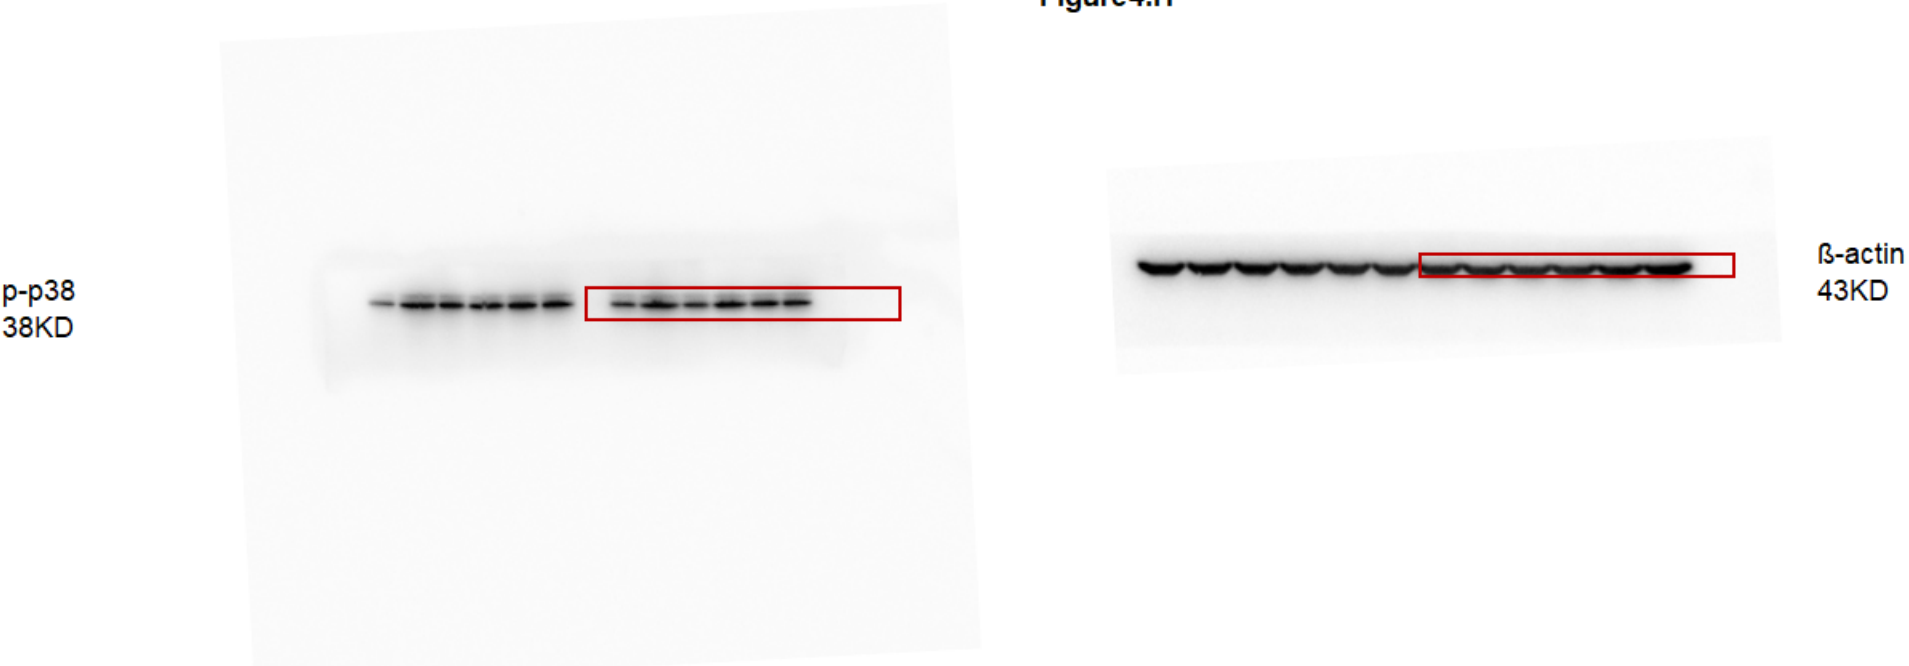



Figure5.A

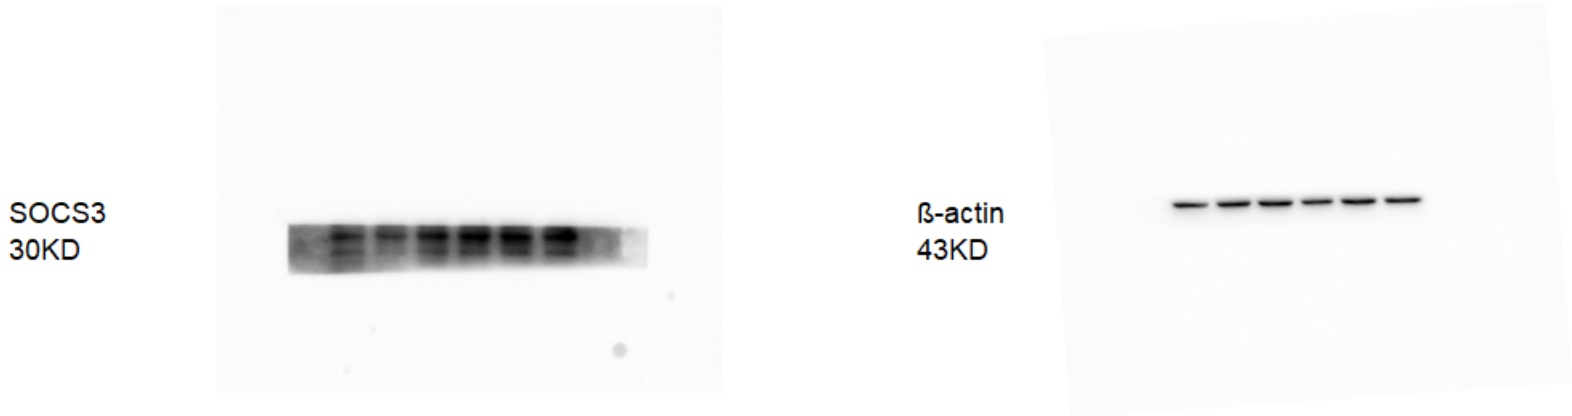

Figure5.B

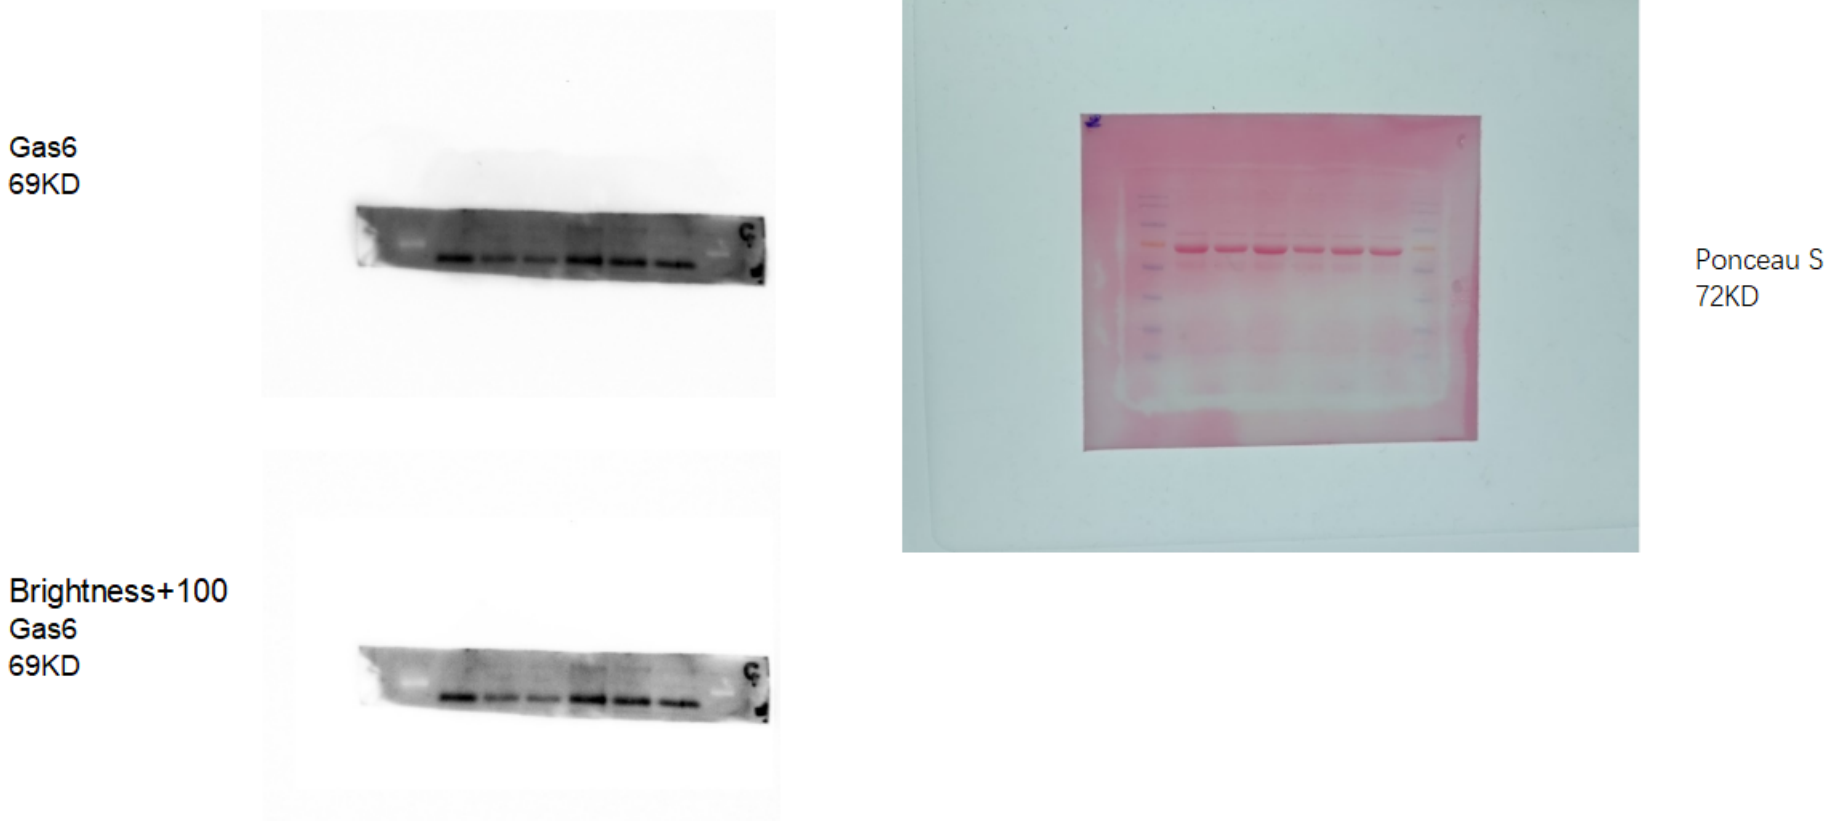

Figure5.C

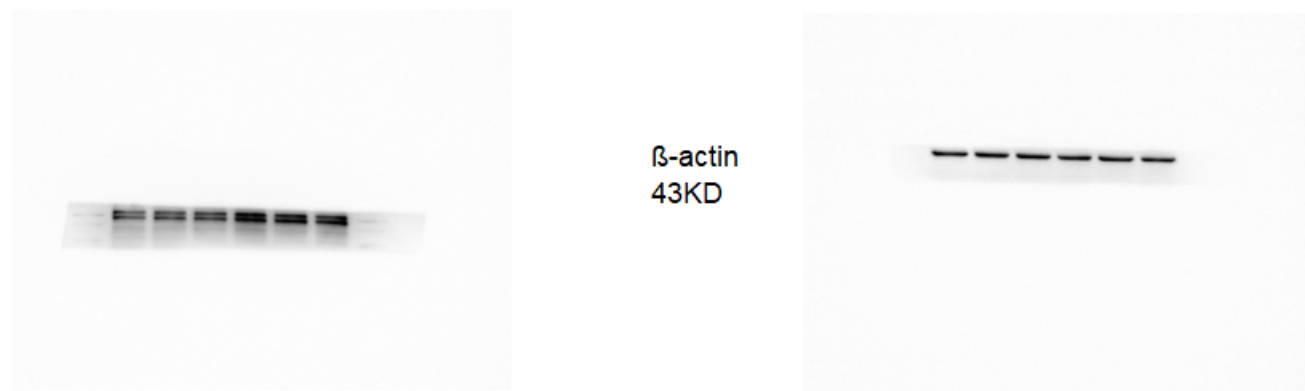

Figure5.D

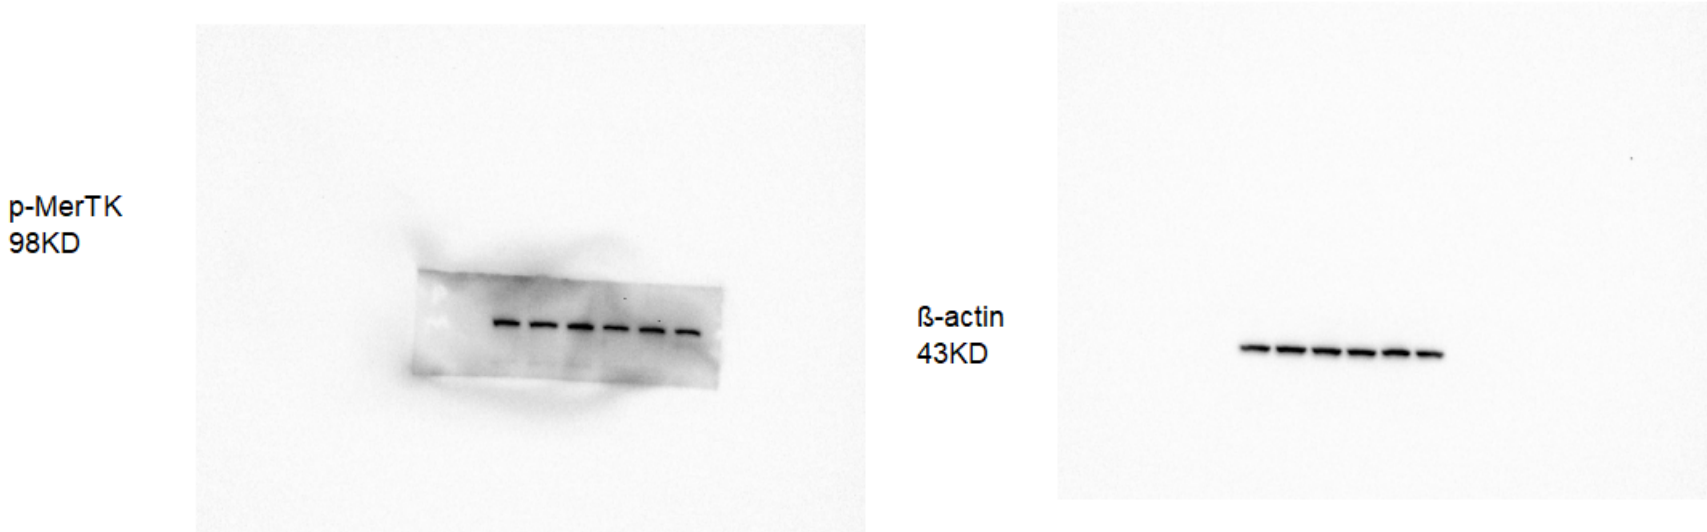

Figure5.E

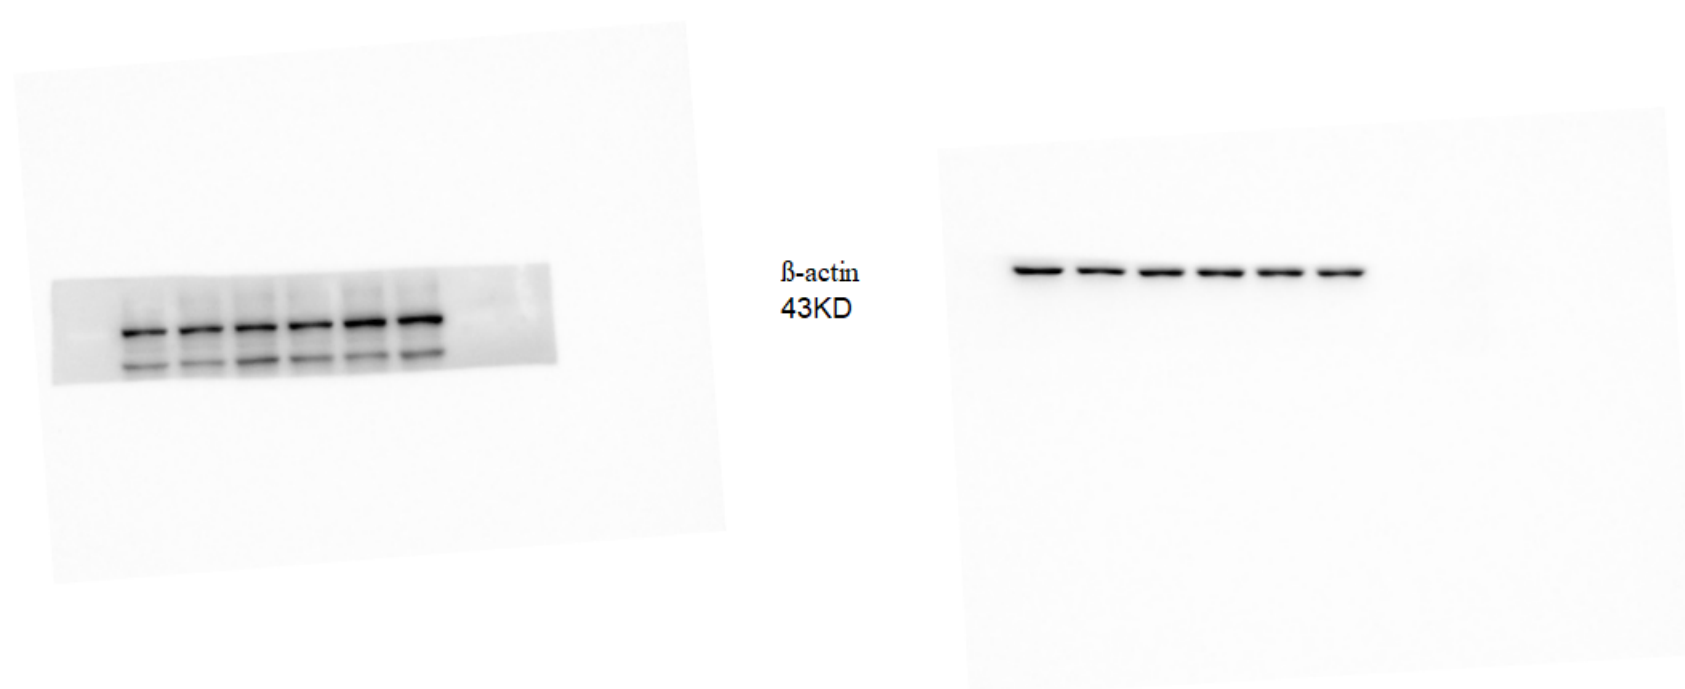

Figure5.F

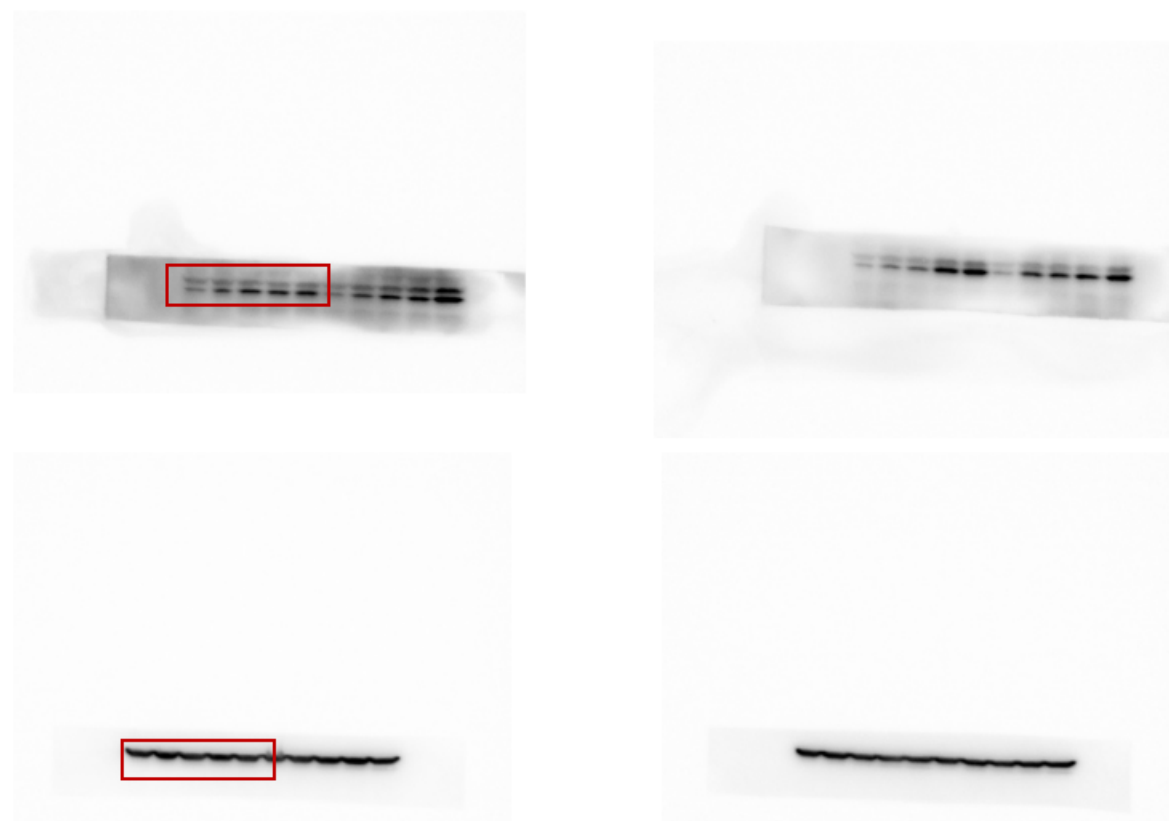

Figure5.G

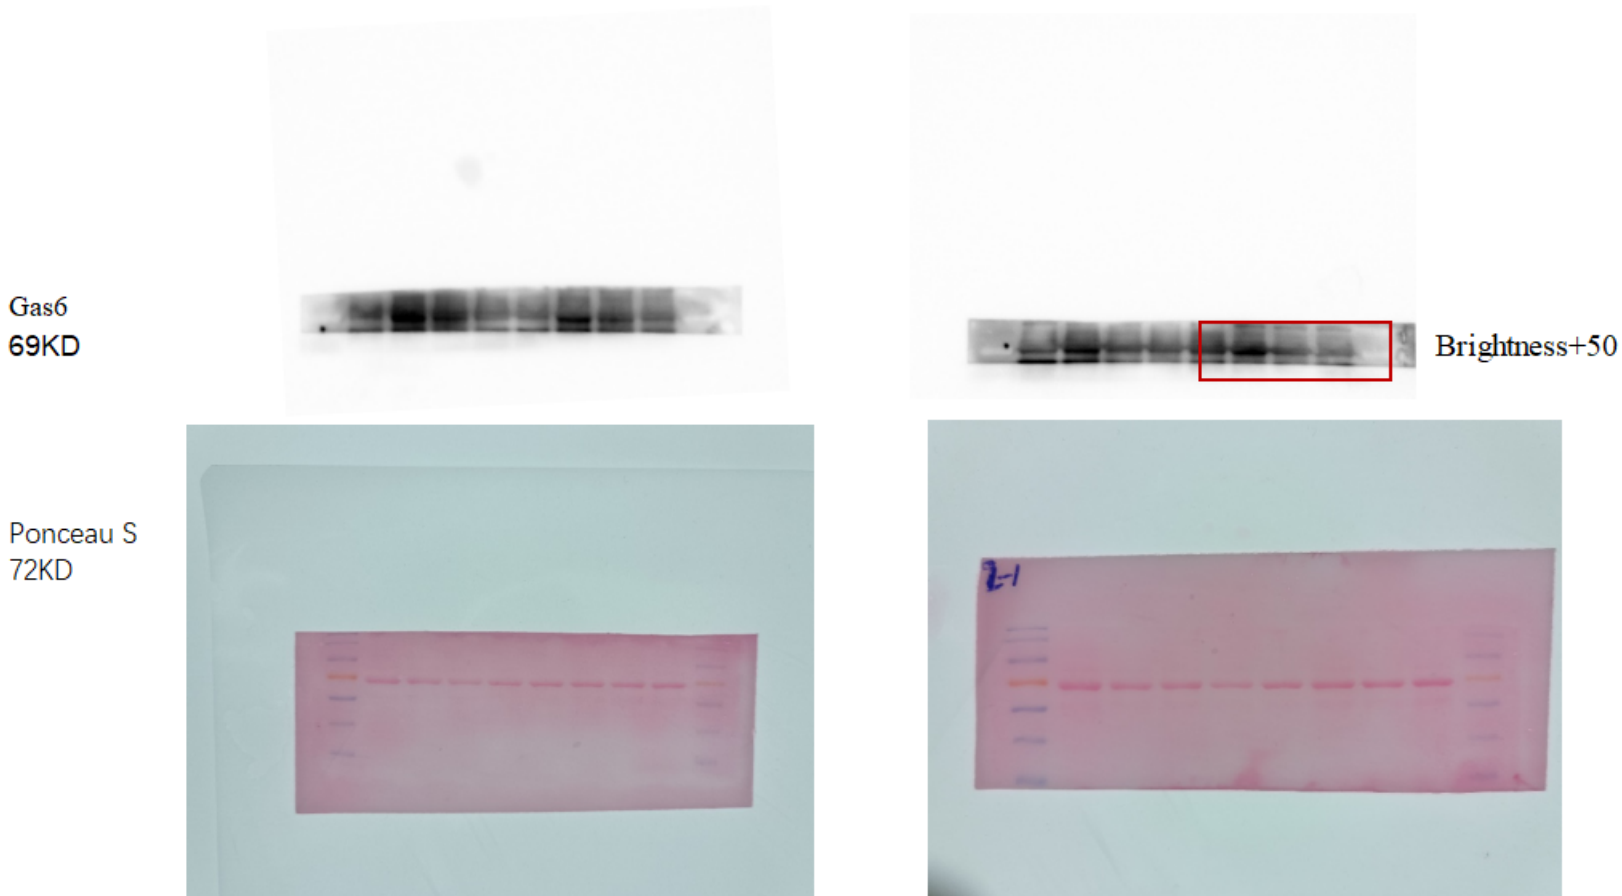

Figure5.H

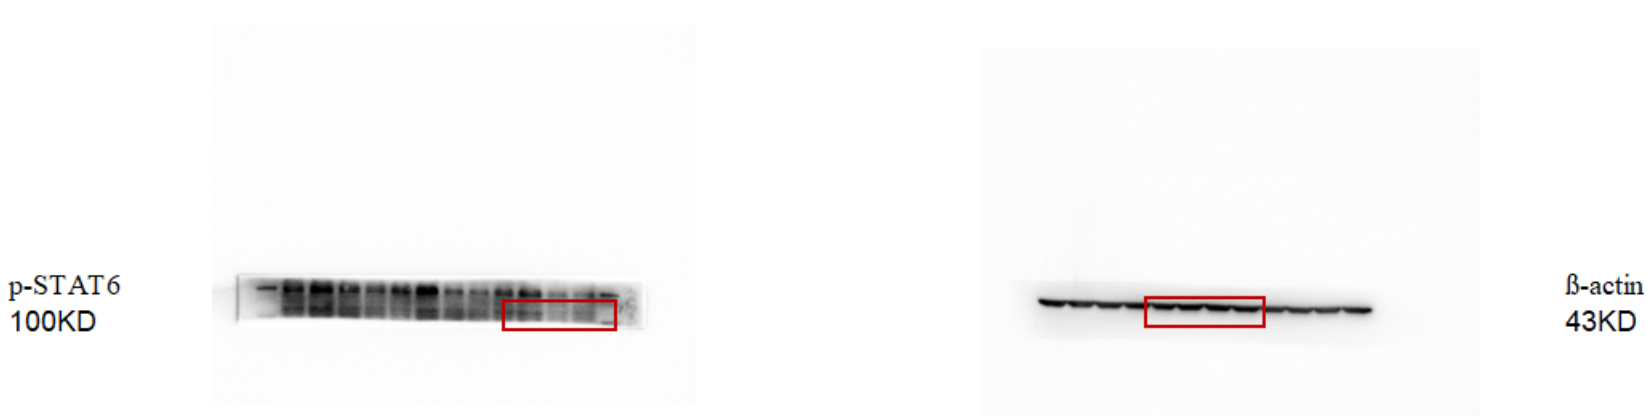

Figure5.I

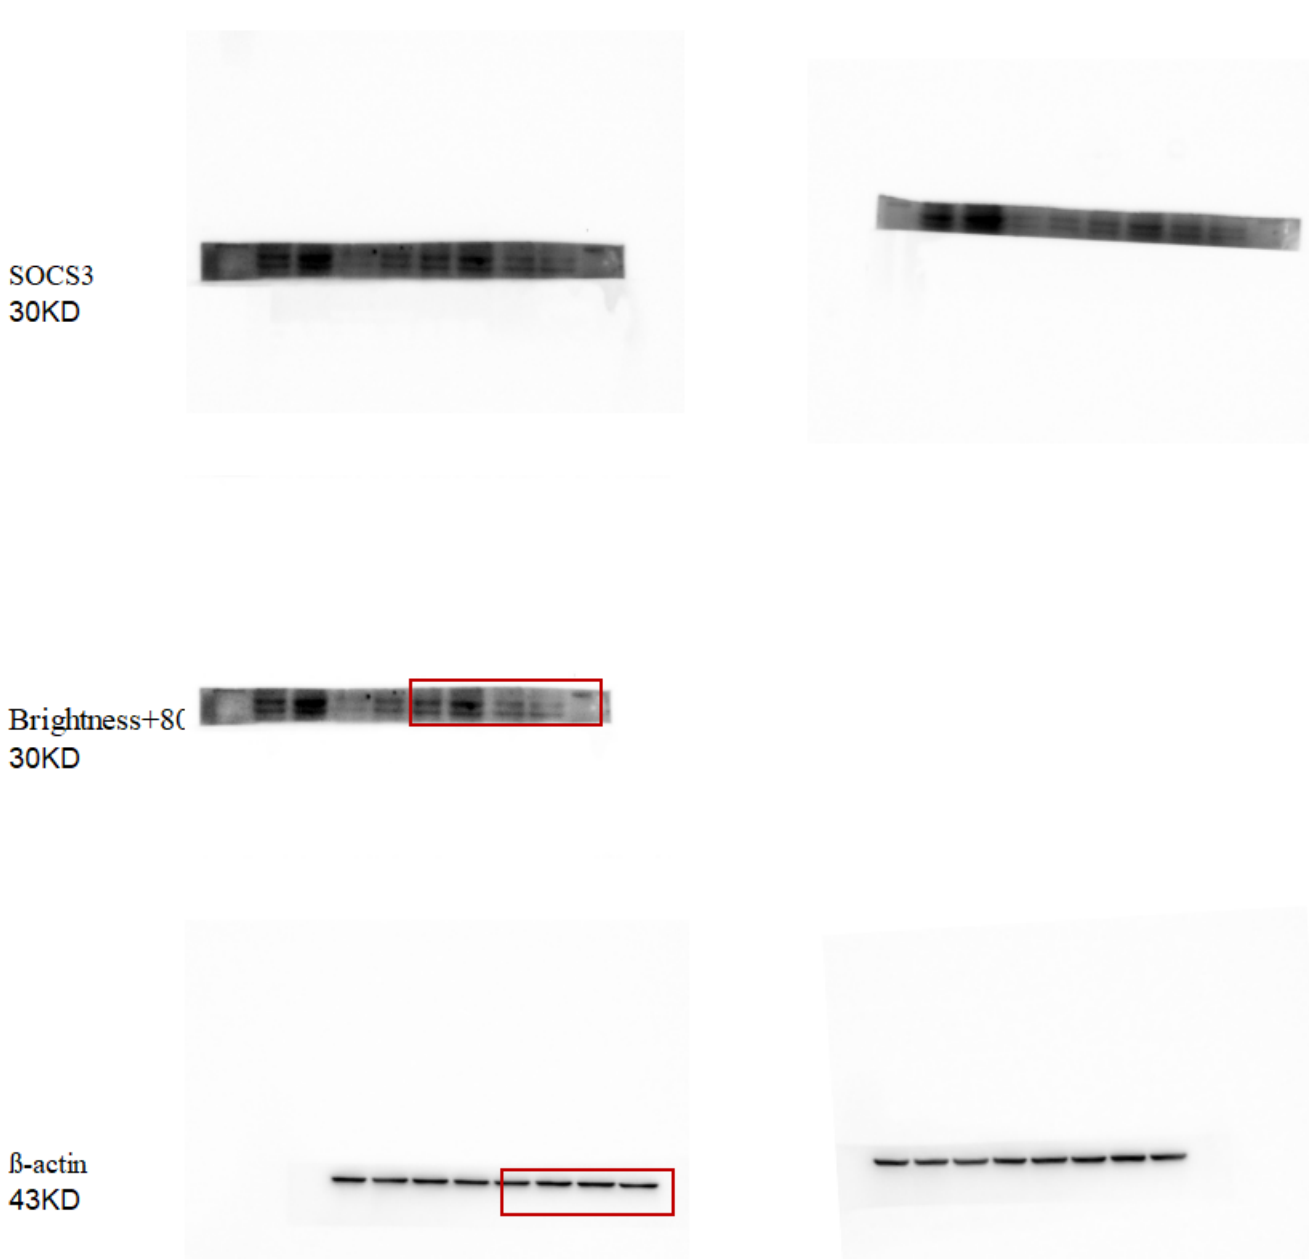

Figure6.B

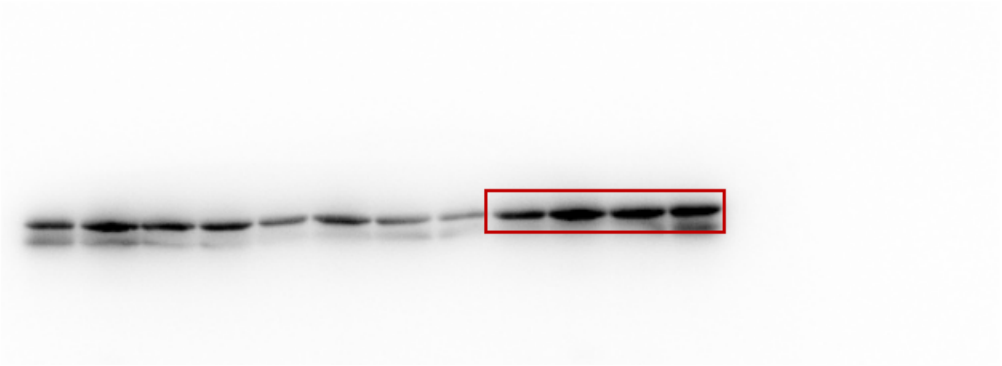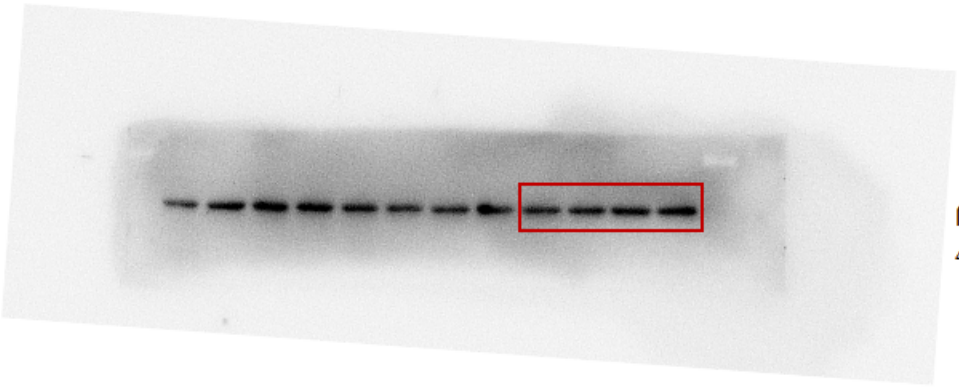

p-p38  
43KD

β-actin  
43KD

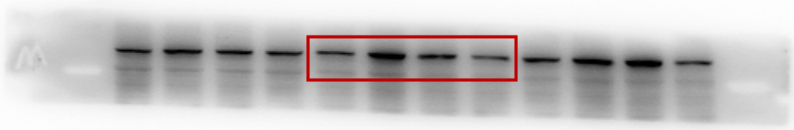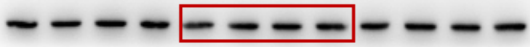

MMP9  
98KD

β-actin  
43KD

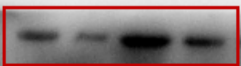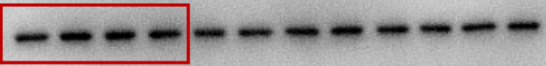

SOCS3  
32KD

β-actin  
43KD

Figure6.F

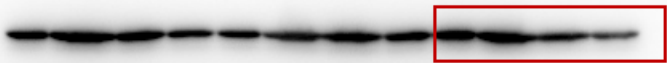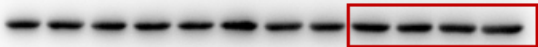

p-p38  
38KD

β-actin  
43KD

Figure6.G

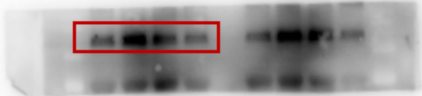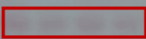

MMP9  
90KD

Ponceaus  
72KD

Figure6.H

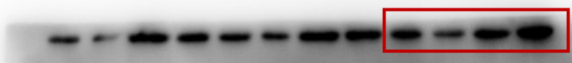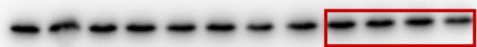

SOCS3  
32KD

β-actin  
43KD
